# Supplementary material for: Epithelial tissue folding pattern in confined geometry
Source: PubMed Central journal article supplement (PMC7203093; doi:10.1007/s10237-019-01249-8), 2019-11-14
Supplement: 10237_2019_1249_MOESM1_ESM.pdf [file 10237_2019_1249_MOESM1_ESM.pdf]

## Supplementary Material

Movie 1(ESM\_1.mp4): There is no notable tissue deformation even after equilibration for 0.5 cell cycle from the initial condition.

Movie 2(ESM\_2.mp4): Epithelial folding simulated under the condition of restraint of out-of-plane deformation ( $k^r = 1 \times 10^{-3}$ ). Division axis is the longest axis of each cell.

Movie 3(ESM\_3.mp4): Epithelial folding simulated under the condition of no restraint of out-of-plane deformation ( $k^r = 0$ ). Division axis is the longest axis of each cell.

Movie 4(ESM\_4.mp4): Epithelial folding simulated under the condition of restraint of out-of-plane deformation ( $k^r = 1 \times 10^{-3}$ ). Division axis is the x-axis.

Movie 5(ESM\_5.mp4): Epithelial folding simulated under the condition of restraint of out-of-plane deformation ( $k^r = 1 \times 10^{-3}$ ). Division axis is the radial axis.
